# Supplementary material
Source: publisher figshare collection journal article supplement (https://acs.figshare.com/ndownloader/files/17803166)
Supplement: Supplementary file 1 [file 17803166]

Supporting Information

for

# **Insecticide Risk in United States Surface Waters: Drivers and Spatiotemporal Modeling**

**Jakob Wolfram<sup>†</sup>, Sebastian Stehle<sup>†,‡</sup>, Sascha Bub<sup>†</sup>, Lara L. Petschick<sup>†</sup>, Ralf Schulz<sup>\*,†</sup>**

<sup>†</sup>iES Landau, Institute for Environmental Sciences, University of Koblenz-Landau,

Fortstrasse 7, D-76829 Landau, Germany

<sup>‡</sup>Eusserthal Ecosystem Research Station, University of Koblenz-Landau, Birkenthalstrasse

13, D-76857 Eusserthal, Germany

\* Phone: +49634128031327; e-mail: [schulz@uni-landau.de](mailto:schulz@uni-landau.de)

Pages S1 – S11

Tables S1 – S7

Figures S1 – S3

## Methods:

### List of degradation products

In the following, a list of all degradation products that were deemed to be potentially relevant to aquatic environments, is provided and more detailed descriptions for their inclusion in this meta-analysis can be found in Wolfram et al.<sup>1</sup>:

Endosulfan sulfate, azinphos-methyl oxygen analog, 3,5,6-trichloro-2-pyridinol, chlorpyrifos oxygen analog, chlorpyrifos oxon, diazoxon, diazinon oxon, malaoxon, isomalathion, malathion dicarboxylic acid, malathion monocarboxylic acid, paraoxon, methyl paraoxon, 3-hydroxycarbofuran, 3-ketocarbofuran, carbofuran phenol, alpha-R-deltamethrin, 6-chloronicotinic acid, imidacloprid guanidine, imidacloprid olefin, imidacloprid olefinic-guanidine, imidacloprid urea, o-p-dichlorobenzophenone, p-p-dichlorobenzophenone, 1,1-bis(p-chlorophenyl)-2,2-dichloroethanol, dichlorobenzhydrol, hydroxyl-dichlorobenzophenone, aldicarb sulfoxide, aldoxycarb, aldicarb sulfone, N-(2-chloro-5-thizolylmethyl)-N'-nitroguanidine, 1-methyl-2-nitro-3-(tetrahydro-3-furylmethyl)-guanidine, 1-methylguanidinium chloride, 3-(methylamino)-9-oxa-2-aza-4-azoniabicyclone-3-enehydrogen succinate, 1-methyl-2-nitroguanidine, 1-methyl-3-(tetrahydro-3-furylmethyl)guanidine, 1-methyl-3-(tetrahydro-3-furylmethyl)-guanidinium dihydrogen phosphate, fipronil sulfone, fipronil sulfide, and desulfinyl fipronil.

### Multiple linear regression validation

MLRs were validated following suggestions of Unwin<sup>2</sup> and references therein. Briefly, the normality distribution of the residuals was checked visually using histograms and QQ-Plots, while the independence of errors was tested using the Durbin-Watson-Test with  $1 > d > 3$  representing thresholds that would suggest autocorrelation.<sup>3</sup> Homoscedasticity was assessed visually by plotting standardized residuals versus their fitted values. Additionally, the

significance of all regression coefficients was checked using White's heteroscedasticity corrected covariance matrix<sup>4</sup> and by calculating regression coefficient 95% confidence intervals. Both tests did not reveal any departure from the initial MLR results. Outliers were assessed with studentized residuals and standardized residuals, while potential leverage points were assessed using hat-values, DFFit, Cook's distance and covariance ratios. Multicollinearity was assessed using variance inflation factors with a threshold level of 3. For MLRs using factorial attributes with more than one degree of freedom (df), generalized variance inflation factors were calculated (GVIF, see Fox and Monette<sup>5</sup>). GVIFs were then transformed back via squaring, allowing comparison with traditionally used threshold levels (i.e.  $VIF < 3$ ). Only substances with more than 20 MICs were used for all MLRs, and no violations of concern became apparent.

### **Internal validation via simulation**

Following aforementioned standard validation exercises, every model was further tested for robustness and validity applying internal validation techniques,<sup>6,7</sup> using a simulation approach (i.e. bootstrapping,  $n = 10,000$ ) of randomly drawn data (with replacements).

#### *Surface water risk (individual substances)*

Detailed summary statistics about bootstrapping simulation runs ( $n = 10,000$ ) of the linear model for individually measured MICs in freshwaters ( $n = 1,833$ ,  $R^2$  adj. = 62.17,  $p < 0.001$ ) are provided in Table S3. Bootstrapping simulation runs ( $n = 10,000$ ) and their resulting adjusted  $R^2$  are summarized in Figure S3.

#### *Sediment risk (individual substances)*

Detailed summary statistics about bootstrapping simulation runs ( $n = 10,000$ ) of the linear model for individually measured MICs in sediments ( $n = 478$ ,  $R^2$  adj. = 48.10,  $p < 0.001$ ) are

provided in Table S6. Bootstrapping simulation runs ( $n = 10,000$ ) and their resulting adjusted  $R^2$  are summarized in Figure S2.

### *Surface water risk (maxTU)*

Detailed summary statistics about bootstrapping simulation runs ( $n = 10,000$ ) of the maximum toxicant pressure (i.e. maxTU) model for surface waters ( $n = 496$ ,  $R^2$  adj. = 75.17,  $p < 0.001$ ) are provided in Table S7. Bootstrapping simulation runs ( $n = 10,000$ ) and their resulting adjusted  $R^2$  are summarized in Figure S3.

## References

1. Wolfram, J.; Stehle, S.; Bub, S.; Petschick, L. L.; Schulz, R., Meta-Analysis of Insecticides in United States Surface Waters: Status and Future Implications. *Environ. Sci. Technol.* **2018**, *52*, (24), 14452-14460.
2. Unwin, A., Discovering Statistics Using R by Andy Field, Jeremy Miles, Zoë Field. *International Statistical Review* **2013**, *81*, (1), 169-170.
3. Durbin, J.; Watson, G. S., Testing for serial correlation in least squares regression. II. *Biometrika* **1951**, *38*, (1/2), 159-177.
4. White, H., A Heteroskedasticity-Consistent Covariance Matrix Estimator and a Direct Test for Heteroskedasticity. *Econometrica* **1980**, *48*, (4), 817-838.
5. Fox, J.; Monette, G., Generalized collinearity diagnostics. *Journal of the American Statistical Association* **1992**, *87*, (417), 178-183.
6. Harrell Jr, F. E., *Regression modeling strategies: with applications to linear models, logistic and ordinal regression, and survival analysis*. Springer: 2015.
7. Steyerberg, E. W.; Harrell Jr, F. E.; Borsboom, G. J.; Eijkemans, M.; Vergouwe, Y.; Habbema, J. D. F., Internal validation of predictive models: efficiency of some procedures for logistic regression analysis. *J. Clin. Epidemiol.* **2001**, *54*, (8), 774-781.
8. Lewis, K. A.; Tzilivakis, J.; Warner, D. J.; Green, A., An international database for pesticide risk assessments and management. *Human and Ecological Risk Assessment: An International Journal* **2016**, *22*, (4), 1050-1064.

## List of Tables

**Table S1:** Regulatory threshold levels (RTL) for freshwater (RTL<sub>fw</sub>), sediments (RTL<sub>sed</sub>) and estuaries (RTL<sub>est</sub>) for all 32 parent compounds. Only insecticide degradates with reported concentrations are listed and provided with a RTL. A full list of degradates of potential environmental concern can be found in the first paragraph of the SI. Please note, this table can also be found in Wolfram et al.<sup>1</sup>

| Insecticide class | Insecticide        | RTL <sub>fw</sub><br>(µg/L) | RTL <sub>sed</sub><br>(µg/kg) | RTL <sub>est</sub><br>(µg/L) |
|-------------------|--------------------|-----------------------------|-------------------------------|------------------------------|
| Organochlorine    | Dicofol            | 26.5                        | 3680                          | 7.55                         |
|                   | Endosulfan         | 0.05                        | 3.84                          | 0.02                         |
| Organophosphate   | Azinphos-methyl    | 0.08                        | 0.89                          | 0.105                        |
|                   | Chlorpyrifos       | 0.03                        | 16                            | 0.0175                       |
|                   | Diazinon           | 0.105                       | 76                            | 2.1                          |
|                   | Malathion          | 0.295                       | 2.56                          | 1.1                          |
|                   | Parathion-ethyl    | 0.02                        | 0.325                         | 0.0535                       |
|                   | Parathion-methyl   | 0.485                       | 20.8                          | 0.175                        |
|                   |                    |                             |                               |                              |
| Carbamate         | Aldicarb           | 10                          |                               | 6                            |
|                   | Carbaryl           | 0.85                        | 4.4                           | 2.85                         |
|                   | Carbofuran         | 1.115                       | 1.72                          | 2.3                          |
| Pyrethroid        | Bifenthrin         | 0.0002465                   | 0.25                          | 0.001985                     |
|                   | Cyfluthrin         | 0.0125                      | 0.53                          | 0.0012                       |
|                   | Cypermethrin       | 0.0018                      | 0.308                         | 0.002375                     |
|                   | ζ-cypermethrin     | 0.0018                      | 0.308                         | 0.002375                     |
|                   | Deltamethrin       | 0.0001                      | 0.48                          | 0.00185                      |
|                   | Esfenvalerate      | 0.000424                    | 7.4                           | 0.00233                      |
|                   | Fenpropathrin      | 0.001525                    | 12.4                          | 0.0105                       |
|                   | Fenvalerate        | 0.016                       | 2.2                           | 0.004                        |
|                   | λ-cyhalothrin      | 0.00015                     | 0.31                          | 0.00245                      |
|                   | Permethrin         | 0.0033                      | 7.4                           | 0.009                        |
|                   | Resmethrin         | 0.14                        |                               | 0.115                        |
|                   | τ-fluvalinate      | 0.155                       |                               | 0.003                        |
|                   | Tefluthrin         | 0.03                        | 11.6                          | 0.0265                       |
|                   | Tetramethrin       | 1.85                        |                               | 1.85                         |
|                   | Tralomethrin       | 0.0195                      |                               | 0.4225                       |
| Neonicotinoid     | Acetamiprid        | 10.5                        |                               | 33                           |
|                   | Clothianidin       | 11                          |                               | 26.5                         |
|                   | Dinotefuran        | 49550                       |                               | 395                          |
|                   | Imidacloprid       | 0.385                       |                               | 16.5                         |
|                   | Thiamethoxam       | 17.5                        | 10                            | 3450                         |
| Phenylpyrazole    | Fipronil           | 0.11                        | 16                            | 0.07                         |
| Degradate         | Endosulfan sulfate | 0.05                        | 73                            | 0.02                         |
|                   | Aldicarb sulfoxide | 21.5                        |                               |                              |
|                   | Aldicarb sulfone   | 184.5                       |                               |                              |
|                   | Fipronil sulfone   | 0.36                        | 9.1                           | 0.28                         |

|                     |       |     |        |
|---------------------|-------|-----|--------|
| Fipronil sulfide    | 1.065 | 29  | 0.0385 |
| Desulfinyl fipronil | 100   | 200 | 0.75   |

**Table S2:** List of covariates and attributes with their respective data type and availability in percent that were extracted from publications and assigned to individual MICs.

| Covariate                     | Data type | Description                                                                                           | Available % |
|-------------------------------|-----------|-------------------------------------------------------------------------------------------------------|-------------|
| Substance name                | factor    | Name of detected insecticide                                                                          | 100         |
| Chemical class                | factor    | Insecticide class (e.g. Organophosphate)                                                              | 100         |
| TU identifier                 | integer   | Shared identifier per sample                                                                          | 100         |
| Reference                     | factor    | Name and date of the respective publication                                                           | 100         |
| Compartment                   | integer   | Integer detailing if MIC was detected in the water phase (1) or sediment phase (2)                    | 100         |
| Sampling interval             | numeric   | Time in days between individual samples per location                                                  | 77.4        |
| Catchment size                | numeric   | Size in km <sup>2</sup> of contributing catchment area per sampling location                          | 81.7        |
| Sampling date                 | numeric   | Date of sampling event                                                                                | 98.1        |
| Location name                 | factor    | Name of sampling location                                                                             | 100         |
| Agricultural produce          | factor    | List of crops grown in respective catchment                                                           | 71.2        |
| Sampling location (state)     | factor    | Federal state in which the sampling location is situated                                              | 97.8        |
| Sampling location (county)    | factor    | County in which the sampling location is situated                                                     | 78.7        |
| Water body type               | factor    | Water body type (e.g. creek, estuary, river) as detailed in the publication                           | 95.6        |
| Freshwater                    | integer   | Integer detailing if the respective water body contains freshwater (1) or estuarine water (2)         | 100         |
| Flow type                     | integer   | Integer detailing if respective water body is flowing (1) or standing (2)                             | 97          |
| Number of detects             | integer   | Number of detections per substance as detailed in the publication                                     | 97.7        |
| Number of non-detects         | integer   | Number of non-detections per substance as detailed in the publication                                 | 83.1        |
| Filtration                    | factor    | Description of filtration procedures used for pyrethroid samples                                      | 95.7        |
| LOD                           | numeric   | Analytical limit of detection for respective substance                                                | 39.9        |
| LOQ                           | numeric   | Analytical limit of quantification for respective substance                                           | 51.1        |
| Additional pesticides         | factor    | Factor indicating if additional pesticides (excluding insecticides) were analyzed                     | 97.7        |
| Additional insecticides       | factor    | Factor indicating if additional insecticides were analyzed                                            | 100         |
| Total pesticides              | integer   | Number of total detected pesticides (excluding insecticides) per sample                               | 100         |
| Total insecticides            | integer   | Number of total detected insecticides per sample                                                      | 65.2        |
| Total Pesticides/Insecticides | factor    | Factor detailing how many pesticides/insecticides were detected                                       | 99          |
| Detected pesticides           | factor    | List of substance names detected per sample                                                           | 61.7        |
| Agricultural origin           | factor    | Factor describing certainty that MICs originated from agricultural NPS as detailed in the publication | 100         |

|                          |         |                                                                                                                           |      |
|--------------------------|---------|---------------------------------------------------------------------------------------------------------------------------|------|
| Agricultural proximity   | factor  | Factor describing if any information was provided regarding the proximity of agricultural fields to the sampling location | 60.9 |
| Highest spatial accuracy | integer | Integer detailing if MIC was attributable to a location (1), county (2), or the federal state (3)                         | 100  |
| Latitude                 | numeric | Latitude of sampling location (GPS)                                                                                       | 75.3 |
| Longitude                | numeric | Longitude of sampling location (GPS)                                                                                      | 75.3 |
| RTL                      | numeric | respective regulatory threshold level                                                                                     | 100  |
| RTL class                | integer | Integer detailing if MIC was attributable to a freshwaters (1), sediments (2), or estuarine waters (3)                    | 100  |

**Table S3:** Detailed summary statistics of model validation simulation runs (bootstrapping,  $n = 10,000$ ) and resulting bootstrapped 95% confidence intervals for the freshwater linear regression of individual MIC to RTL ratios. Standardized betas with their respective rank (SBR) and variance inflation factors (VIF) of the main model are provided for reference.

| Predictor variable                                                    | Lower<br>95%-<br>confidence<br>limit | 2 <sup>nd</sup><br>quartile<br>(median) | Upper<br>95%-<br>confidence<br>limit | Sign. <sup>1</sup> | Std.<br>beta | SBR <sup>2</sup> | VIF   |
|-----------------------------------------------------------------------|--------------------------------------|-----------------------------------------|--------------------------------------|--------------------|--------------|------------------|-------|
| Intercept                                                             | -2.302                               | -1.928                                  | -1.542                               | *                  |              |                  |       |
| Catchment size [km <sup>2</sup> ] <sup>3</sup>                        | -0.183                               | -0.151                                  | -0.120                               | *                  | -0.146       | 4                | 1.897 |
| Sampling interval [d] <sup>3</sup>                                    | -0.227                               | -0.199                                  | -0.170                               | *                  | -0.189       | 3                | 1.311 |
| Time [y]                                                              | -0.064                               | -0.057                                  | -0.050                               | *                  | -0.287       | 2                | 2.283 |
| toxicity-normalized use [kg $\times$ RTL <sup>-1</sup> ] <sup>3</sup> | 0.350                                | 0.385                                   | 0.422                                | *                  | 0.381        | 1                | 1.987 |
| Burst factor                                                          | 0.011                                | 0.015                                   | 0.019                                | *                  | 0.131        | 5                | 2.310 |
| Irrigated agricultural land-use [%]                                   | 0.289                                | 0.427                                   | 0.560                                | *                  | 0.101        | 6                | 1.448 |
| Organophosphates                                                      | -0.034                               | 0.242                                   | 0.518                                |                    |              |                  | 1.653 |
| Pyrethroids                                                           | 0.944                                | 1.231                                   | 1.516                                | *                  |              |                  | 1.653 |
| Neonicotinoids                                                        | 0.130                                | 0.436                                   | 0.726                                | *                  |              |                  | 1.653 |
| Phenylpyrazole                                                        | 0.807                                | 1.235                                   | 1.678                                | *                  |              |                  | 1.653 |

<sup>1</sup> Determined based on confidence level overlap

<sup>2</sup> Ranked standardized betas of linear model

<sup>3</sup> Predictor variable was transformed by the decadal logarithm

**Table S4:** Comparison of insecticides' stability in days (i.e. DT<sub>50</sub>) in different compartments and the resulting delta in days. Data was obtained from Lewis et al.<sup>8</sup>.

| Substance              | DT <sub>50</sub> in days<br>(sediment) | DT <sub>50</sub> in days<br>(water) | Delta |
|------------------------|----------------------------------------|-------------------------------------|-------|
| Malathion              | 0.4                                    | 0.4                                 | 0     |
| Diazinon               | 10.4                                   | 4.3                                 | 6.1   |
| Endosulfan             | N/A                                    | N/A                                 | N/A   |
| Chlorpyrifos           | 36.5                                   | 5                                   | 31.5  |
| Bifenthrin             | 161                                    | 8                                   | 153   |
| $\Lambda$ -cyhalothrin | 15.1                                   | 0.24                                | 14.86 |

|                     |            |            |            |
|---------------------|------------|------------|------------|
| Esfenvalerate       | 56         | 30         | 26         |
| Fenpropathrin       | 28         | 1          | 27         |
| Carbaryl            | 5.8        | 3.1        | 2.7        |
| Carbofuran          | 9.7        | 6.1        | 3.6        |
| Permethrin          | 40         | 23         | 17         |
| Deltamethrin        | 65         | 17         | 48         |
| Cypermethrin        | 17         | 3          | 14         |
| Fenvalerate         | <i>N/A</i> | <i>N/A</i> | <i>N/A</i> |
| Parathion-methyl    | 4.3        | 3.5        | 0.8        |
| Cyfluthrin          | 8          | 1          | 7          |
| Cypermethrin-zeta   | 2          | 0.1        | 1.9        |
| Fipronil            | 68         | 54         | 14         |
| Desulfinyl-Fipronil | <i>N/A</i> | <i>N/A</i> | <i>N/A</i> |
| Fipronil sulfide    | <i>N/A</i> | <i>N/A</i> | <i>N/A</i> |
| Fipronil sulfone    | <i>N/A</i> | <i>N/A</i> | <i>N/A</i> |
| Dicofol             | 29         | <i>NA</i>  | <i>N/A</i> |

**Table S5:** Toxic modes of action for respective insecticide classes used in the present study.

| Insecticide class | Toxic Mode of Action (TMoA)                          |
|-------------------|------------------------------------------------------|
| Organochlorine    | GABA-gated chloride channel antagonist               |
| Organophosphate   | Acetylcholinesterase inhibitor                       |
| Carbamate         | Acetylcholinesterase inhibitor                       |
| Pyrethroid        | Sodium channel modulators                            |
| Neonicotinoid     | Nicotinic acetylcholine receptor agonists            |
| Phenylpyrazole    | GABA <sub>A</sub> -gated chloride channel antagonist |

**Table S6:** Detailed summary statistics of model validation simulation runs (bootstrapping,  $n = 10,000$ ) and resulting bootstrapped 95% confidence intervals for the sediment linear regression of individual MIC to RTL ratios. Standardized betas with their respective rank (SBR) and variance inflation factors (VIF) of the main model are provided for reference.

| Predictor variable                                | Lower<br>95%-<br>confidence<br>limit | 2 <sup>nd</sup><br>quartile<br>(median) | Upper<br>95%-<br>confidence<br>limit | Sign. <sup>1</sup> | Std.<br>beta | SBR <sup>2</sup> | VIF   |
|---------------------------------------------------|--------------------------------------|-----------------------------------------|--------------------------------------|--------------------|--------------|------------------|-------|
| Intercept                                         | -3.239                               | -2.414                                  | -1.602                               | *                  |              |                  |       |
| Catchment size [km <sup>2</sup> ] <sup>2</sup>    | -0.142                               | -0.101                                  | -0.061                               | *                  | -0.097       | 6                | 1.150 |
| Sampling interval [d] <sup>2</sup>                | -0.085                               | -0.053                                  | -0.021                               | *                  | -0.075       | 7                | 1.257 |
| Time [y]                                          | -0.085                               | -0.067                                  | -0.049                               | *                  | -0.215       | 2                | 1.274 |
| Toxicity-normalized use [kg × RTL-1] <sup>2</sup> | 0.087                                | 0.188                                   | 0.281                                | *                  | 0.170        | 3                | 1.808 |
| Lentic bodies [factor]                            | -0.528                               | -0.367                                  | -0.210                               | *                  | -0.098       | 5                | 1.336 |
| Irrigated agricultural land-use [%]               | 0.312                                | 0.481                                   | 0.656                                | *                  | 0.126        | 4                | 1.236 |
| KOC [L/kg] <sup>2</sup>                           | 0.617                                | 0.769                                   | 0.965                                | *                  | 0.506        | 1                | 2.879 |
| Organophosphates [factor]                         | -1.326                               | -0.783                                  | -0.301                               | *                  |              |                  | 1.368 |



|                         |        |        |       |       |
|-------------------------|--------|--------|-------|-------|
| Pyrethroids [factor]    | -0.946 | -0.421 | 0.063 | 1.368 |
| Phenylpyrazole [factor] | -2.117 | -0.798 | 0.379 | 1.368 |

<sup>1</sup> Determined based on confidence level overlap

<sup>2</sup> Predictor variable was transformed by the decadal logarithm

<sup>3</sup> Ranked standardized betas of linear model

**Table S7:** Detailed summary statistics of model validation simulation runs (bootstrapping,  $n = 10,000$ ) and resulting bootstrapped 95% confidence intervals for the mixture toxicity (maxTU, freshwaters) linear regression of individual MIC to RTL ratios. Standardized betas with their respective rank (SBR) and variance inflation factors (VIF) of the main model are provided for reference.

| Predictor variable                                                    | Lower<br>95%-<br>confidence<br>limit | 2 <sup>nd</sup><br>quartile<br>(median) | Upper<br>95%-<br>confidence<br>limit | Sign. <sup>1</sup> | Std.<br>beta | SBR <sup>2</sup> | VIF   |
|-----------------------------------------------------------------------|--------------------------------------|-----------------------------------------|--------------------------------------|--------------------|--------------|------------------|-------|
| Intercept                                                             | -2.219                               | -1.736                                  | -1.243                               | *                  |              |                  |       |
| Catchment size [km <sup>2</sup> ] <sup>3</sup>                        | -0.393                               | -0.314                                  | -0.238                               | *                  | -0.246       | 3                | 2.071 |
| Sampling interval [d] <sup>3</sup>                                    | -0.194                               | -0.130                                  | -0.063                               | *                  | -0.106       | 7                | 1.470 |
| Burst factor                                                          | 0.010                                | 0.018                                   | 0.025                                | *                  | 0.138        | 6                | 2.180 |
| Time [y]                                                              | -0.074                               | -0.063                                  | -0.053                               | *                  | -0.269       | 2                | 1.180 |
| Toxicity-normalized use [kg $\times$ RTL <sup>-1</sup> ] <sup>3</sup> | 0.394                                | 0.448                                   | 0.503                                | *                  | 0.411        | 1                | 1.490 |
| Number of detected substances                                         | 0.050                                | 0.073                                   | 0.097                                | *                  | 0.151        | 5                | 1.665 |
| Irrigated agricultural land-use [%]                                   | 0.726                                | 0.989                                   | 1.254                                | *                  | 0.209        | 4                | 1.453 |

<sup>1</sup> Determined based on confidence level overlap

<sup>2</sup> Ranked standardized betas of linear model

<sup>3</sup> Predictor variable was transformed by the decadal logarithm

## List of figures

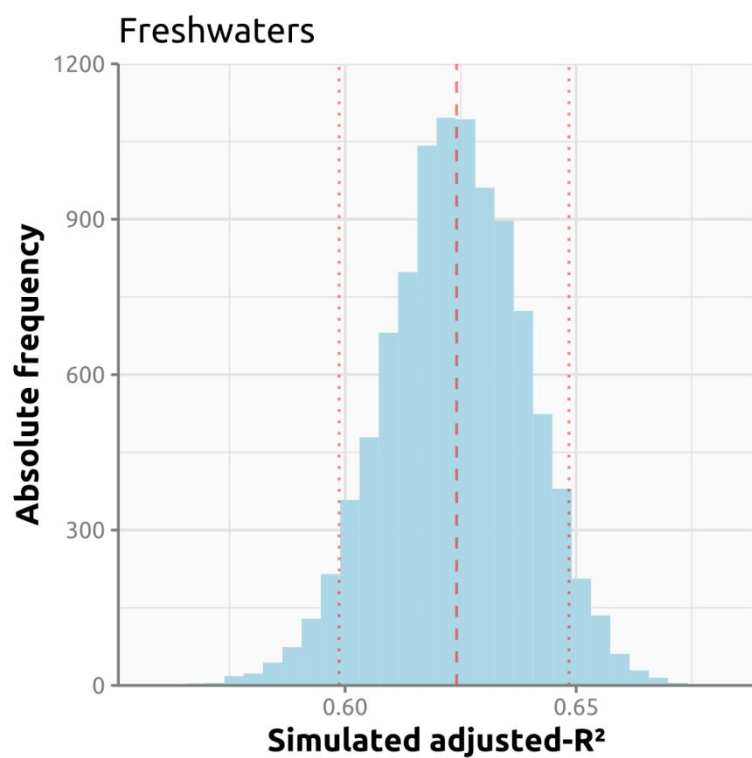

**Figure S1:** Frequency plot detailing the distribution of bootstrap simulated ( $n = 10,000$ ) adj.  $R^2$  of the multiple linear regression for insecticide risks in freshwaters. Bootstrapped upper and lower 95% confidence intervals are depicted by dotted (orange) lines and the median is depicted by a red dashed line.

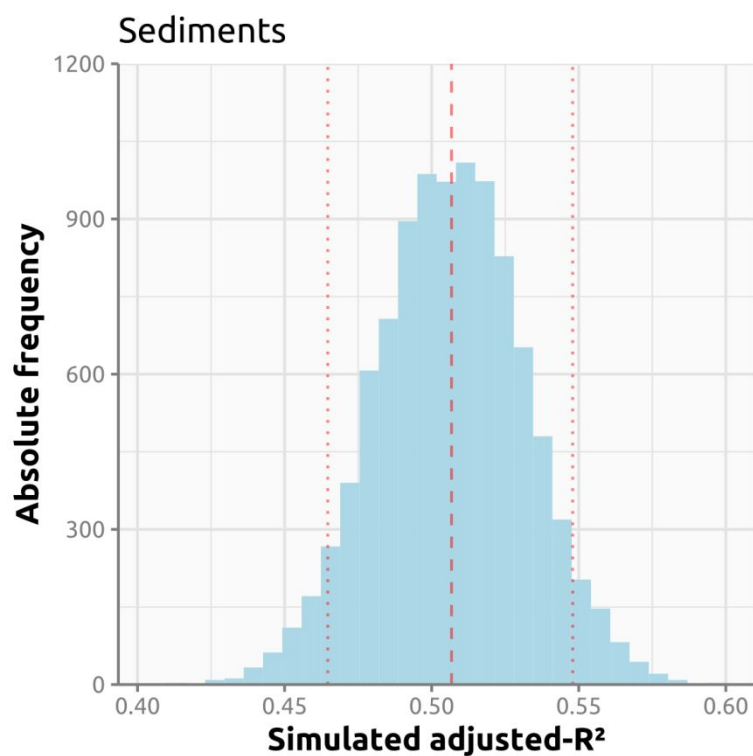

**Figure S2:** Frequency plot detailing the distribution of bootstrap simulated ( $n = 10,000$ ) adj.  $R^2$  of the multiple linear regression for insecticide risks in sediments. Bootstrapped upper and lower 95% confidence intervals are depicted by dotted (orange) lines and the median is depicted by a red dashed line.

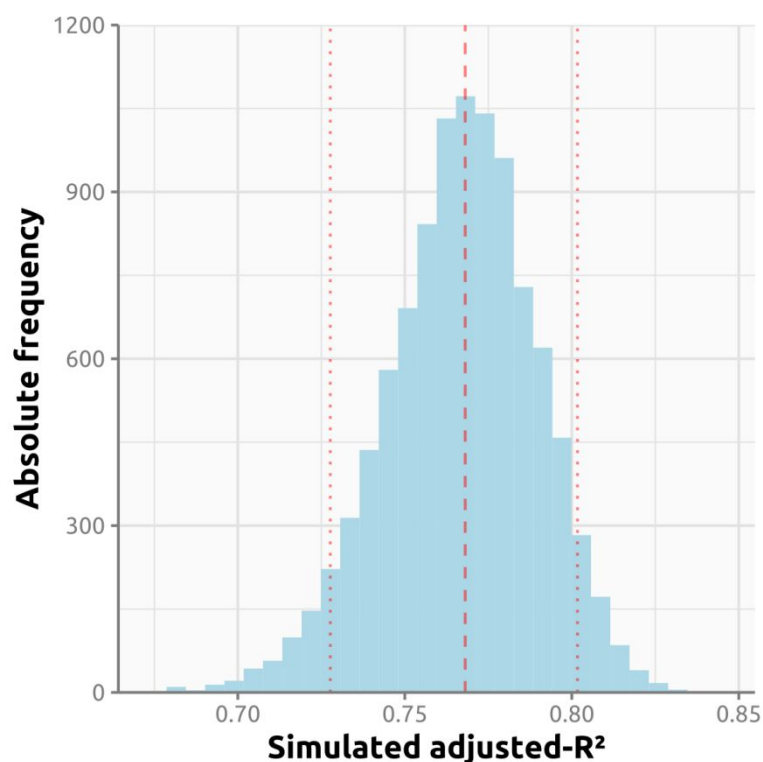

**Figure S3:** Frequency plot detailing the distribution of bootstrap simulated ( $n = 10,000$ ) adj.  $R^2$  of the maxTU multiple linear regression. Bootstrapped upper and lower 95% confidence intervals are depicted by dotted (orange) lines and the median is depicted by a red dashed line.
